# Supplementary material for: The lncRNA Plscr4 Controls Cardiac Hypertrophy by Regulating miR-214
Source: PubMed Central journal article supplement — Mol Ther Nucleic Acids. 2017 Dec 30;10:387–97. doi: 10.1016/j.omtn.2017.12.018 (PMC5862136; doi:10.1016/j.omtn.2017.12.018), 2017-12-30
Supplement: mmc1.pdf [file mmc1.pdf]

OMTN, Volume 10

## **Supplemental Information**

### **The lncRNA Plscr4 Controls Cardiac**

### **Hypertrophy by Regulating miR-214**

**Lifang Lv, Tianyu Li, Xuelian Li, Chaoqian Xu, Qiushuang Liu, Hua Jiang, Yingnan Li, Yingqi Liu, He Yan, Qihe Huang, Yuhong Zhou, Mingyu Zhang, Hongli Shan, and Haihai Liang**

**$\alpha$ -actinin/DAPI**

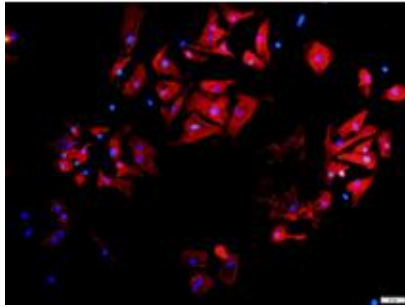

**Figure S1 Identification of cultured neonatal mice cardiomyocytes.**

Cardiomyocytes were stained with antibody against  $\alpha$ -actinin for detecting of CMs and with DAPI for the nuclear of cells. scale bars, 20 $\mu$ m.

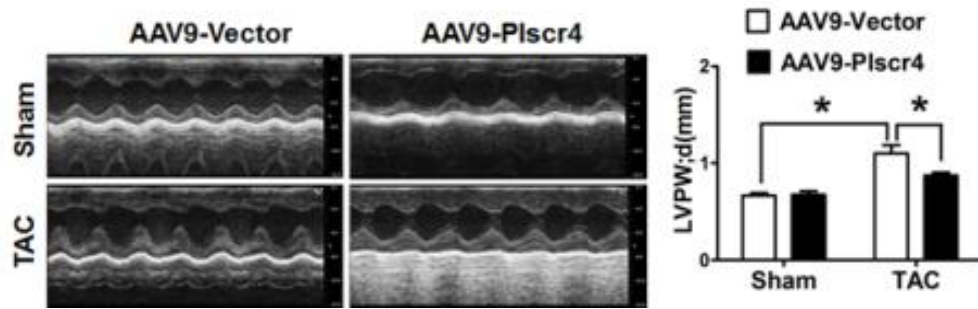

**Figure S2 Overexpression of Plscr4 attenuates the pressure overload–induced cardiac left ventricular wall thickness.** Quantitative analysis of the diastolic left ventricular posterior wall diameter (LVPW:d) by echocardiography in the AAV9-Vector or AAV9-Plscr4 overexpressing mice subjected to the Sham or TAC operation for 4 weeks. (n = 6, \* $P < 0.05$ ).

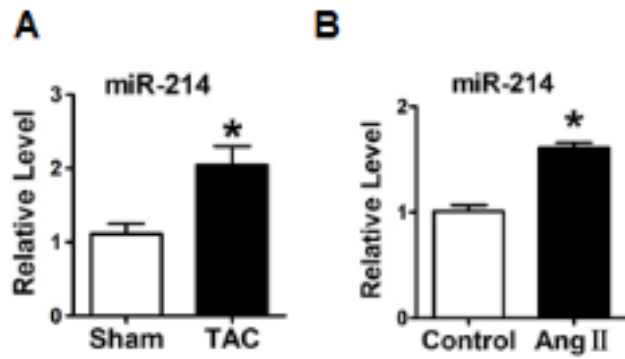

**Figure S3 miR-214 is upregulated in response to hypertrophic stress. A.** The relative level of miR-214 in mice 4 weeks after the sham or TAC treatment (n = 6, \* $P < 0.05$  v.s. Sham). **B.** The relative level of miR-214 in the cardiomyocytes after a 48 h treatment of PBS or Ang II. (n = 6, \* $P < 0.05$  v.s. Control).

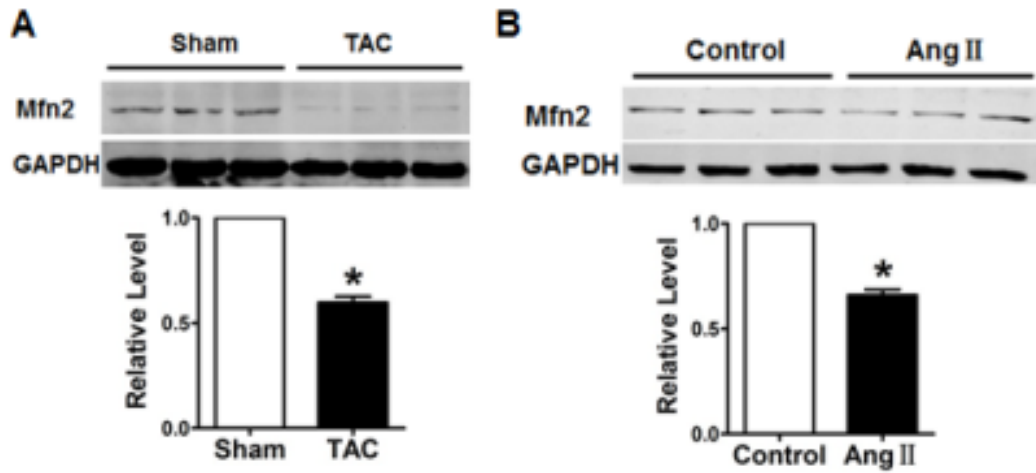

**Figure S4 Protein level of Mfn2 is downregulated in response to hypertrophic stress.** **A.** Representative western blot bands of Mfn2 in the Sham and TAC group. The protein expression was quantified and normalized to GAPDH (n = 6 per group; \* $P < 0.05$  v.s. Sham). **B.** Representative western blot bands of Mfn2 in the CMs after a 48 h treatment with PBS or Ang II. The protein expression was quantified and normalized to GAPDH (n =6; \* $P < 0.05$  v.s. Control).

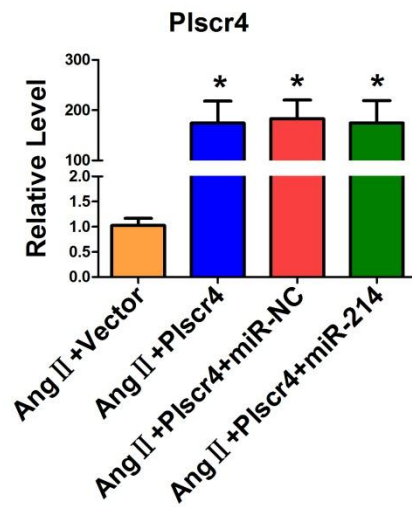

**Figure S5 The successful transfection of Plscr4.** The relative mRNA levels of Plscr4 in the CMs transfected with Plscr4 or the Vector alone or in combination with miR-214 or miR-NC followed by 48 h of Ang II treatment (n = 6, \* $P < 0.05$  v.s. Ang II+Vector).

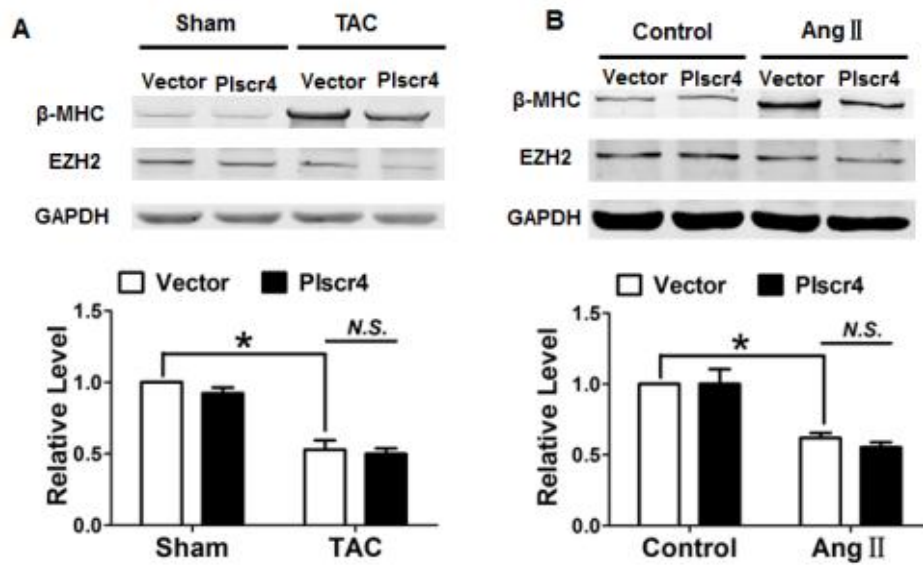

**Figure S6 Protein level of EZH2 are downregulated in response to hypertrophic stress which is not influenced by Plscr4.** **A.** Representative western blot bands of EZH2 in the AAV9-Vector or AAV9-Plscr4 overexpression mice after 4 weeks of the TAC or sham operation. (n = 3, \* $P < 0.05$ ). **B.** Representative western blot bands of EZH2 in the CMs transfected with lncRNA-plscr4 or the Vector control that were subsequently treated with phosphate-buffered saline (PBS) or Ang II (1  $\mu\text{mol/L}$ ) for 48 h (n = 4, \* $P < 0.05$ ).





Mouse gctgctttggcagtagttactttctgatgaattaggtacttataggaaggacagtaatacatatgttatacaatggtatcaacatattccacagatgaca

Human atagtgtagtcaataatta=====

\* \* \* \* \*

Mouse aatggggaaggacttttgattgcaggagccaatcacagcctacagttttct

Human =====

**Table S2 Primers used for the qRT-PCR analysis.**

| <b>RNA name</b> | <b>Primers from 5' to 3'</b>                           |
|-----------------|--------------------------------------------------------|
| Plscr4—F        | GAGGCTGCTTTGGCAGTAGT                                   |
| Plscr4—R        | GCTCCTGCAATCAAAAGTCC                                   |
| ANP—F           | ACCTGCTAGACCACCTGGAG                                   |
| ANP—R           | CCTTGGCTGTTATCTTCGGTACCGG                              |
| BNP—F           | GAGGTCACTCCTATCCTCTGG                                  |
| BNP—R           | GCCATTTCTCCGACTTTTCTC                                  |
| $\beta$ -MHC-F  | CCGAGTCCCAGGTCAACAA                                    |
| $\beta$ -MHC-R  | CTTCACGGGCACCCTTGGA                                    |
| GAPDH-F         | TCTACATGTTCCAGTATGACTC                                 |
| GAPDH-R         | ACTCCACGACATACTCAGCACC                                 |
| U6-RT           | CGCTTCACGAATTTGCGTGTCAT                                |
| U6-F            | GCTTCGGCAGCACATATACTAAAAT                              |
| U6-R            | CGCTTCACGAATTTGCGTGTCAT                                |
| miR-214-3p-RT   | GTCGTATCCAGTGCAGGGTCCGAGGTATTC<br>GCACTGGATACGACACTGCC |
| miR-214-3p-F    | GCGGACAGCAGGCACAGACA                                   |
| miR-214-3p-R    | ATCCAGTGCAGGGTCCGAGG                                   |
